# Supplementary material for: Crossroads of Belt and Road Initiative: The image framing of China in Nepali print media
Source: Research Square preprint supplement (doi:10.21203/rs.3.rs-6380233/v1), 2025-05-16
Supplement: Supplementary file 1 [file 5704de1f13551374fe90435b.xlsx]

## Sheet: BRI Mou
		Published date		Heading	BRI Related	Position	Categories				Page		Tone			frame
	S.N.	Nepali	English				NWS	EDI	OPI	REM/INT	1st PG	PG	Positive	Neutral	Negative	Political	Economic	Infrastructure development	Strategic	Cultural exchange	miscellaneous
NPND	1	2073-12-10	March, 2017	These forums, these weapons of power	BRI	OPI			1			4			-1	1
	2	2073-12-11	March, 2017	Prime Minister on China visit	1	EDI		1				4		1		1
	3	2073-12-11	March, 2017	Nepalese opportunity in Boao	1	OPI			1			4	1				1
	4	2073-12-17	March, 2017	Strengthening trust and understanding with China: Prime Minister	1	REM/INT				1	1	1	1			1
	5	2073-12-18	March, 2017	Should we think 'One Nepal policy'?	1	OPI			1			4			-1	1
	6	2073-12-18	March, 2017	President of China to visit America: It will prove to be a milestone in the development of relations	1	NWS	1					14	1			1
	7	2073-12-25	April, 2017	Five agendas for the Trump-Jinping talks	1	NWS	1					14		1					1
	8	2073-12-26	April, 2017	India should also participate in OBOR	BRI	OPI			1			12	1					1
	9	2073-12-30	April, 2017	Election material coming from China today	1	NWS	1					2		1							1
	10	2073-12-31	April, 2017	Telephone conversation between the presidents of China and the United States: China insists on a peaceful solution to the Pyongyang conflict	1	NWS	1					10	1						1
	11	2074-01-01	April, 2017	North Gate Rasuwagadhi	1	NWS	1					31			-1			1
	12	2074-01-04	April, 2017	Nepal-China Joint Training Begins (Army)	1	NWS	1					2		1					1
	13	2074-01-07	April, 2017	A New Dimension of Nepal-China Relations: Tourism Development	1	REM/INT				1		12	1			1
	14	2074-01-08	April, 2017	Why does Nepal not learn from China?	1	OPI			1			8	1							1
	15	1974-01-23	May, 2017	State influence in Chinese banks	1	OPI			1			12		1			1
	16	2074-01-30	May, 2017	Signing of the One Belt One Rod framework	BRI	NWS	1				1	1	1			1
	17	2074-01-30	May, 2017	About obor: what is it?	1	NWS	1				1	1		1				1
	18	2074-01-30	May, 2017	It's better to blend in with the rest of the world	BRI	REM/INT				1	1	1	1					1
	19	2074-01-31	May, 2017	Will China's influence increase from the new Silk Route?	BRI	OPI			1			6			-1				1
	20	2074-01-31	May, 2017	Welcome reception photos by Primer li to Pakistan prime minister nawaj sarif	1	NWS	1					10	1								1
	21	2074-01-31	May, 2017	Why is India opposing OBOR?	BRI	OPI			1			12	1					1
	22	2074-02-01	May, 2017	China has laid the foundation for cooperation	1	REM/INT				1		10	1				1
	23	2074-02-02	May, 2017	world's most eminent person's conference begins	1	NWS	1					10		1		1
	24	2074-02-02	May, 2017	China's commitment to run railways up to the border of Nepal	1	NWS	1					11	1					1
	25	2074-02-02	May, 2017	China's major economic challenges	1	OPI			1			12			-1		1
	26	2074-02-03	May, 2017	ASEAN can benefit from OBOR	BRI	REM/INT				1		10	1				1
	27	2074-02-04	May, 2017	Bri: A few footnotes	BRI	OPI			1			6	1					1
	28	2074-02-06	May, 2017	G20 and G7 take inspiration from the Silk Road	BRI	OPI			1			13	1				1
	29	2074-03-01	June, 2017	Chinese investors attracted to hospitality industry: commitment to invest more than three billion	1	NWS	1					13	1				1
	30	2074-03-02	June, 2017	America and China can cheat the Thucydides Trap?	1	OPI			1			6			-1				1
	31	2074-03-06	June, 2017	Nepal-China Foreign Secretary level meeting	1	NWS	1					2		1		1
	32	2074-03-07	June, 2017	Nepal-China Foreign Secretary level meeting held: Agreed to implement the agreement	1	NWS	1					2		1		1
	33	2074-03-07	June, 2017	China's distance with Kathmandu is getting closer	1	NWS	1					2	1					1
	34	2074-03-14	June, 2017	Nepal should benefit from China and India: Expert	1	REM/INT				1		12		1			1
	35	2074-03-17	July, 2027	Armed Police Academy was established in two and a half years of the agreement with China: The police academy to be built by India has been stalled for 20 years.	1	NWS	1					2	1						1
	36	2074-03-17	July, 2027	Chinese arrested with 1 crore Buddha's mind	1	NWS	1					2			-1						1
	37	2074-03-17	July, 2027	India-China border dispute	1	NWS	1					10			-1				1
KND	38	2073-12-01	March, 2017	Dahal is preparing to go to China, the Chinese Defense Minister is coming to Nepal	1	NWS	1					2		1		1
	39	2073-12-03	March, 2017	Weak preparations for the visit to China	1	REM/INT				1		3			-1			1
	40	2073-12-04	March, 2017	The visit of the Prime Minister to China will be official	1	NWS	1					4	1			1
	41	2073-12-04	March, 2017	Uttarayana of Prachanda	1	OPI			1			7			-1	1
	42	2073-12-05	March, 2017	Chances of an agreement with China are low	BRI	NWS	1					2			-1	1
	43	2073-12-05	March, 2017	Cooperation is needed to overcome the discomfort: Chinese ambassador	1	REM/INT				1		2	1			1
	44	2073-12-05	March, 2017	Chinese subsidized salt warehouse: because of branding	1	NWS	1					13			-1		1
	45	2073-12-07	March, 2017	There is no justification for the new agreement: expert	1	REM/INT				1		9			-1	1
	46	2073-12-08	March, 2017	The Prime Minister will hold a meeting with the Chinese President	1	NWS	1					3	1			1
	47	2073-12-08	March, 2017	China visit: the beginning of a balanced relationship?	1	OPI			1			6			-1				1
	48	2073-12-08	March, 2017	"One Belt One Road" in the proposal of the United Nations	BRI	NWS	1					12	1				1
	49	2073-12-09	March, 2017	An unprepared visit o prachanda	1	OPI			1			7			-1	1
	50	2073-12-10	March, 2017	PM's visit to China will be fruitful: Foreign Minister Mahat	1	REM/INT				1	1	1	1			1
	51	2073-12-10	March, 2017	China is interested in the West!	1	OPI			1			7			-1				1
	52	2073-12-11	March, 2017	Prime Minister toward China: Dahal's commitment to remove the latest scandal from the tour	1	NWS	1					2			-1	1
	53	2073-12-11	March, 2017	Chinese Defense Minister's Interests: One China Policy and OBOR	BRI	NWS	1					2		1			1
	54	2073-12-11	March, 2017	Nepal becomes Switzerland: Chinese expert	1	REM/INT				1		2	1				1
	55	2073-12-11	March, 2017	Trade and supply agenda at low priority	1	NWS	1					15			-1		1
	56	2073-12-12	March, 2017	The Prime Minister arrived in China	1	NWS	1					3		1		1
	57	2073-12-12	March, 2017	Nepal participates in One Road One Belt: Dahal	BRI	REM/INT				1		3	1				1
	58	2073-12-12	March, 2017	Let's not allow anti-China movement	1	NWS	1					3	1						1
	59	2073-12-12	March, 2017	Suggestion to proceed with the bri contract	1	NWS	1					3	1				1
	60	2073-12-13	March, 2017	Nepal's signature ahead of the Ober conference	BRI	REM/INT				1	1	1	1				1
	61	2073-12-13	March, 2017	At the BOAO Forum, the Prime Minister said: Asia is the economic hub of the world	1	REM/INT				1		2	1				1
	62	2073-12-13	March, 2017	Prime Minister in Beijing	1	NWS	1					2		1							1
	63	2073-12-13	March, 2017	Chinese defense minister returned	1	NWS	1					3		1					1
	64	2073-12-13	March, 2017	Prime Minister's China visit and about to expertise	1	OPI			1			6		1		1
	65	2073-12-14	March, 2017	China insists on Nepal's participation in OBOR	1	NWS	1					3			-1				1
	66	2073-12-14	March, 2017	Nepal-China Military Diplomacy-7	1	OPI			1			7		1					1
	67	2073-12-15	March, 2017	China's concern in implementing the Constitution	1	NWS	1				1	1			-1	1
	68	2073-12-16	March, 2017	Photo pm retuna	1	NWS	1				1	1		1							1
	69	2073-12-17	March, 2017	Prime Minister's visit to China: What has been achieved?	1	NWS	1					9			-1			1
	70	2073-12-18	March, 2017	OBOR and Nepal-China relations	BRI	OPI			1			6		1					1
	71	2073-12-20	April, 2017	Beards are banned in China	1	NWS	1					11			-1					1
	72	2073-12-21	April, 2017	Sino-Indian relations have got cold	1	NWS	1					18		1					1
	73	2073-12-26	April, 2017	How much do we know about China?	1	OPI			1			kha	1							1
	74	2073-12-27	April, 2017	"American Dream of Chinese Youth"	1	NWS	1					10			-1					1
	75	2074-01-01	April, 2017	Nepal-China joint military exercise the day after tomorrow	1	NWS	1				1	1		1					1
	76	2074-01-04	April, 2017	Nepal-China joint military exercise begins	1	NWS	1					2		1					1
	77	2074-01-05	April, 2017	Apples decay in the kerung	1	NWS	1					18			-1		1
	78	2074-01-06	April, 2017	Connecting South Asia from Kerung to China	BRI	NWS	1					3	1					1
	79	2074-01-08	April, 2017	OBOR 'signs with conditions'	1	NWS	1				1	1		1				1
	80	2074-01-08	April, 2017	Consulate office open in Guangzhou	1	NWS	1					3		1				1
	81	2074-01-10	April, 2017	China is always with Nepali people in difficulty	1	REM/INT				1		2	1			1
	82	2074-01-10	April, 2017	Prachanda's examination after visiting China	1	OPI			1			7	1				1
	83	2074-01-15	April, 2017	Nepal is the hub of South Asia through OBOR	BRI	NWS	1					16	1					1
	84	2074-01-18	May, 2017	China should put pressure on North Korea-turmp	1	NWS	1					10			-1				1
	85	2074-01-18	May, 2017	Fixed signature on OBOR	BRI	NWS	1				1	1	1					1
	86	2074-01-27	May, 2017	'Rail-link' required along with signature on obor	1	NWS	1					2		1				1
	87	2074-01-29	May, 2017	OBOR Conference and Nepal	BRI	OPI			1			6	1				1
	88	2074-01-30	May, 2017	Singed on OBOR with photo-1,2	BRI	NWS	1				1	1		1		1
	89	2074-01-30	May, 2017	Got along with good neighbors:China	1	REM/INT				1	1	1	1			1
	90	2074-01-30	May, 2017	'Border seal' stranded Nepalese in Chinese territory-12	1	NWS	1					12			-1						1
	91	2074-01-31	May, 2017	Signed two more agreements with China today	1	NWS	1					2		1				1
	92	2074-01-31	May, 2017	Bri conference begins	BRI	NWS	1					10		1		1
	93	2074-02-01	May, 2017	Nepal's proposal with China: Connect Kathmandu on rail link-2	1	NWS	1					2		1				1
	94	2074-02-01	May, 2017	Aspire to lead the world-7	1	OPI			1			7	1				1
	95	2074-02-02	May, 2017	Next priority project selection-6	BRI	EDI		1				6		1				1
	96	2074-02-02	May, 2017	The meaning of the signature in OBOR-6	BRI	OPI			1			6		1				1
	97	2074-02-02	May, 2017	Advice from China experts: Take OBOR to implementation	BRI	REM/INT				1		16	1					1
	98	2074-02-03	May, 2017	OBOR is Inspirational: Rodrigo (Philippines president)	BRI	REM/INT				1		12	1			1
	99	2074-02-03	May, 2017	China will build an industrial park in Damak-17	1	NWS	1					17	1					1
	100	2074-02-04	May, 2017	OB Entry Opportunities and Challenges-7	BRI	OPI			1			7	1				1
	101	2074-02-04	May, 2017	OBOR is milestone for Nepal: Speaker -16	BRI	REM/INT				1		16	1					1
	102	2074-02-07	May, 2017	OBOR's objectives and Nepal's priorities	BRI	OPI			1			6			-1			1
	103	2074-02-09	May, 2017	How will the local government connect with Obor?	1	OPI			1			7	1					1
	104	2074-02-12	May, 2017	Nepal 2.0, skeptical	1	OPI			1			6	1				1
	105	2074-02-24	June, 2017	India and China congratulate Deuba-3	1	NWS	1					3		1							1
	106	2074-02-24	June, 2017	'Belt and Road Initiative' for development and brotherhood: President Xi-18	BRI	REM/INT				1		18	1					1
	107	2074-02-24	June, 2017	Railway project a 'stunning achievement' in Belt and Road	BRI	NWS	1					18	1					1
	108	2074-02-24	June, 2017	A Chinese mobile internet company will change the world's digital culture-18	1	NWS	1					18		1						1
	109	2074-02-28	June, 2017	Promotion of tourism in Guangzhou and Chengdu-2	1	NWS	1					2		1						1
	110	2074-02-28	June, 2017	China hosts the World Cup:	1	NWS	1					18	1							1
	111	2/31/74	June, 2017	China's proposals and neighborhood interests-6	1	OPI			1			6			-1				1
	112	2/31/74	June, 2017	What to do after joining BRI? 7	BRI	OPI			1			7		1				1
	113	2074-03-02	June, 2017	The Nepal-China mechanism meeting could not be held	1	NWS	1					13			-1	1
	114	2074-03-04	June, 2017	Looking at India and China, we can become a model of development	1	REM/INT				1		7		1				1
	115	2074-03-05	June, 2017	Chinese ambassador met with Dahal and Oli	1	NWS	1					2		1		1
	116	2074-03-07	June, 2017	China positive on easy 'connectivity'-3	1	NWS	1					3	1					1
	117	2074-03-08	June, 2017	After the opening of the Corolla checkpoint, there is a rush at the border-17	1	NWS	1					17	1							1
	118	2074-03-08	June, 2017	Relationships in a new frame: assistant fore. minister. Gung senyu-18	1	REM/INT				1		18	1			1
	119	2074-03-11	June, 2017	120 missing in landslides in China	1	NWS	1					14			-1						1
	120	2074-03-13	June, 2017	XI's book breaks records	1	NWS	1					12	1							1
	121	2074-03-18	July, 2017	Chinese President's Warning: 'Attempts to challenge Beijing are unacceptable'	1	NWS	1					11		1					1
	122	2074-03-21	July, 2017	Vice President to China-2	1	NWS	1					2		1						1
	123	2074-03-21	July, 2017	The Chinese Experience in Poverty Alleviation-7	1	OPI			1			7	1				1
	124	2074-03-25	July, 2017	India-China-Bhutan border dispute: 'Doklam not military, political hall'	1	NWS	1					12		1					1
	125	2074-03-27	July, 2017	The growing problem on the Sino-Indian border	1	OPI			1			6		1						1
	126	2074-03-29	July, 2017	An indication of the Doklam conflict-6	1	OPI			1			6		1					1
	127	2074-03-29	July, 2017	China sent troops to Djibouti-12	1	NWS	1					12			-1				1
	128	2074-03-29	July, 2017	Trilateral military exercises in the Indian Ocean	1	NWS	1					12		1					1
	129	2074-03-30	July, 2017	India-China: The Threat of a New Cold War	1	OPI			1			7			-1				1
	130	2074-03-31	July, 2017	International condemnation of China	1	NWS	1					10			-1	1
APND	131	2073-12-01	March, 2017	The Prime Minister is going to China today	1	NWS	1				1	1		1		1
	132	2073-12-01	March, 2017	The Silk Road is gaining momentum-4	BRI	OPI			1			4	1					1
	133	2073-12-02	March, 2017	Bharatpur-Bardghat transmission line unscheduled: Chinese contractor's negligence-1	1	NWS	1				1	1			-1			1
	134	2073-12-03	March, 2017	Claims to have saved India-China from conflict: Baburam Bhattarai	1	REM/INT				1		3		1					1
	135	2073-12-05	March, 2017	Dahal-XI meeting scheduled: The Prime Minister will go to Beijing on the 10th of Chaitra, meet Xi on the 11th, and go to Boao on the 12th-1	1	NWS	1				1	1		1							1
	136	2073-12-07	March, 2017	Preparations for the visit to China are weak: foreign affairs Experts	1	REM/INT				1		3			-1		1
	137	2073-12-08	March, 2017	Resam Marg, Nepal, South Asia	BRI	OPI			1			6	1					1
	138	2073-12-09	March, 2017	The Prime Minister is going to China with a 15-member team-2	1	NWS	1				1	1			-1					1
	139	2073-12-09	March, 2017	China visit-6	1	EDI		1				6		1		1
	140	2073-12-09	March, 2017	After Chou An apologized	1	OPI			1			6			-1	1
	141	2073-12-10	March, 2017	There will be no agreement on the Prime Minister's visit to China-3	1	NWS	1					3			-1	1
	142	2073-12-10	March, 2017	Chinese Defense Minister is coming to Nepal-3	1	NWS	1					3		1					1
	143	2073-12-11	March, 2017	Prime Minister towards China: Chinese Defense Minister in Kathmandu-1	1	NWS	1				1	1			-1				1
	144	2073-12-11	March, 2017	Partnership in 'One Belt One Rod'-1	BRI	REM/INT				1	1	1	1				1
	145	2073-12-11	March, 2017	South Asia benefits from One Belt One Road-3	BRI	REM/INT				1		3	1				1
	146	2073-12-12	March, 2017	Chinese formula: The solution in parties' concensus-1	1	NWS	1				1	1			-1	1
	147	2073-12-13	March, 2017	PM dahal in Beijing	1	NWS	1					2		1							1
	148	2073-12-14	March, 2017	PM-XI meeting today: 'The change of government has not affected the relationship with China': dahal	1	REM/INT				1		3	1						1
	149	2073-12-15	March, 2017	Let's increase faith-XI; Let's work together in international and regional affairs - Dahal	1	REM/INT				1	1	1		1					1
	150	2073-12-16	March, 2017	China wants elections soon: Mahat-1	1	REM/INT				1	1	1			-1	1
	151	2073-12-16	March, 2017	China will build a consulate office in Lahsa-2	1	NWS	1					2	1				1
	152	2073-12-16	March, 2017	China visit	1	EDI		1				6		1				1
	153	2073-12-17	March, 2017	'Chinese desire stability'-1 pm remark	1	REM/INT				1	1	1	1			1
	154	2073-12-17	March, 2017	Promotion of Chinese tourism in Pokhara-kha	1	NWS	1					kha	1							1
	155	2073-12-21	April, 2017	A nominal prime minister	1	OPI			1			7			-1		1
	156	1973-12-24	April, 2017	Dalai Lama's visit to Arunachal: 'Shock in Sino-Indian Relations'	1	REM/INT				1		12			-1				1
	157	2073-12-25	April, 2017	Nepal should go to 'Belt and Road'	BRI	OPI			1			6	1					1
	158	2073-12-26	April, 2017	Chinese Film Festival in Kathmandu	1	NWS	1					12		1						1
	159	2073-12-29	April, 2017	India's New Tibet Policy	1	OPI			1			6	1						1
	160	2074-01-01	April, 2017	Nepal-China joint military exercise on Sunday	1	NWS	1					3			-1				1
	161	2074-01-02	April, 2017	A year of diplomatic instability	1	OPI			1			7			-1	1
	162	2074-01-03	April, 2017	Chinese soldiers arrived in Kathmandu	1	NWS	1					3		1					1
	163	2074-01-04	April, 2017	Controlled Instablility: India did not like that China was trying to bring a train to Lumbini	BRI	OPI			1			6		1					1
	164	2074-01-13	April, 2017	Nepal-China joint military training is over	1	NWS	1					2		1					1
	165	2074-01-16	April, 2017	Proposal to connect Chinese rail to Lumbini	1	NWS	1					3	1					1
	166	2074-01-17	April, 2017	Nepal at the OBOR Summit: Prepared to be signed by the Finance Minister	BRI	NWS	1				1	1	1				1
	167	2074-01-19	May, 2017	The 'Great-Game' and the Belt and Road Strategy	BRI	OPI			1			6			-1				1
	168	2074-01-21	May, 2017	Communist leaders help the Dalai Lama	1	REM/INT				1		12			-1	1
	169	2074-01-22	May, 2017	A market dependent on mobiles imported from China	1	NWS	1					Gha			-1		1
	170	2074-01-23	May, 2017	India-China is connecting	BRI	OPI			1			7	1					1
	171	2074-01-26	May, 2017	Nepal is becoming a member of OBOR this week	BRI	NWS	1					2	1				1
	172	2074-01-29	May, 2017	Dalai Lama- American MPs meet China's objection	1	REM/INT				1		9			-1				1
	173	2074-01-30	May, 2017	Signed in OBOR	BRI	NWS	1					3		1		1
	174	2074-01-31	May, 2017	Finance Minister for OBOR in China	BRI	NWS	1					3		1			1
	175	2074-02-01	May, 2017	China is happy about the election	1	NWS	1							1		1
	176	2074-02-02	May, 2017	The prominent person of the world in Beijing	1	NWS	1					12,	1			1
	177	2074-02-03	May, 2017	OBOR-	BRI	EDI		1				6		1				1
	178	2074-02-03	May, 2017	OBOR Project Inspiration for ASEAN: President Rodrigo	BRI	REM/INT				1		12	1					1
	179	2074-02-06	May, 2017	Signing One Belt One Road is according to Nepal's interests	BRI	NWS	1					3		1			1
	180	2074-02-07	May, 2017	Gautam Budh Airport construction delayed: Chinese company in action	1	NWS	1					6			-1			1
	181	2074-02-08	May, 2017	Very Corridor connecting China and India	1	NWS	1					Ga	1					1
	182	2074-02-14	May, 2017	Regional cold war and turmoil: The new constitution has rejected the reality and heritage of the country	1	OPI			1			6			-1				1
	183	2074-02-16	May, 2017	Equal relations with China and India	1	NWS	1					2		1					1
	184		May, 2017	Dalai Lama, India and America-6	1	OPI			1			6			-1				1
	185	2074-02-17	May, 2017	Chinese cooperation in cross-border development	1	NWS	1				1	1	1					1
	186	2074-02-19	June, 2017	Chinese-invested railways in Nairobi	BRI	NWS	1					9	1					1
	187	2074-02-20	June, 2017	Strong relations with neighbors	1	REM/INT				1		3		1		1
	188	2074-02-22	June, 2017	China's call	1	OPI			1			7			-1				1
	189	2074-02-23	June, 2017	Prosperity through companionship with neighbors	1	OPI			1			7		1		1
	190	2074-02-24	June, 2017	Nepal-China cooperation progressed	1	NWS	1					11	1			1
	191	2074-02-25	June, 2017	We want to work with the new government: china	1	REM/INT				1		2	1			1
	192	2074-02-28	June, 2017	Success of OBOR depends on China: JNU Prof	BRI	REM/INT				1		2			-1			1
	193	2074-03-03	June, 2017	Nepal-China meeting within the week	1	NWS	1					2		1		1
	194	2074-03-05	June, 2017	A trick to slow down the Budhigandaki	1	OPI			1			7			-1			1
	195	2074-03-06	June, 2017	Shanghai Organization and India-6	1	OPI			1			6,		1			1
	196	2074-03-06	June, 2017	A quarter billion investment commitment from the new Asian Infrastructure Bank	1	NWS	1					ka	1				1
	197	2074-03-07	June, 2017	Kerung in four hours!-1	1	NWS	1				1	1	1					1
	198	2074-03-07	June, 2017	flight of Tibet Airlines to Kathmandu begins	1	NWS	1					ka	1							1
	199	2074-03-12	June, 2017	Xi Visiting Hong Kong	1	NWS	1					12		1		1
	200	2074-03-13	June, 2017	The Chinese were difficulty to enter Nepal	1	NWS	1					11		1						1
	201	2074-03-13	June, 2017	Mechanism to execute the Bri	BRI	NWS	1				1	1	1					1
	202	2074-03-14	June, 2017	Budhigandaki project and Gejuwa-7	1	OPI			1			7			-1			1
	203	2074-03-14	June, 2017	Remove Indian Army from Nathula: China	1	NWS	1					12	1						1
	204	2074-03-20	July, 2017	India-China tension and Nepal-6	1	OPI			1			6			-1				1
	205	2074-03-20	July, 2017	THEAD threatens China and Russia: Xi Jinping-12	1	REM/INT				1		12			-1				1
	206	2074-03-21	July, 2017	We failed to take advantage of our neighbors: Mahara	1	REM/INT				1		3		1			1
	207	2074-03-22	July, 2017	Why did the dispute flare up on the India-China border?	1	NWS	1					12			-1				1
	208	2074-03-23	July, 2017	Belt and Road New Opportunities-3	BRI	REM/INT				1		3	1					1
	209	2074-03-23	July, 2017	Doklam dispute and Nepal-6	1	OPI			1			6	1						1
	210	2074-03-25	July, 2017	'Nepal need not panic' about India-China tension-3	1	REM/INT				1		3	1			1
	211	2074-03-25	July, 2017	Vice President in Yenan, China-2	1	NWS	1					2		1							1
	212	2074-03-06	July, 2017	American influence to India and china: To depend on another nation is to lose one's independent existence	1	OPI			1			6			-1	1
	213	2074-03-27	July, 2017	India tried to make Nepal Sikkim	1	NWS	1					3	1						1
	214	2074-03-30	July, 2017	Nepal in the Indo-China conflict	1	OPI			1			7		1					1
	215		July, 2017	Nobel Prize Winner Liu Dies-9	1	NWS	1					9			-1	1

## Sheet: Only BRI
	Bri related news and contents
	NPND	1	2073-12-10		These forums, these weapons of power	BRI	OPI			1			4			-1	1
		2	2073-12-26		India should also participate in OBOR	BRI	OPI			1			12	1					1
		3	2074-01-30		Signing of the One Belt One Rod framework	BRI	NWS	1				1	1	1			1
		4	2074-01-30		It's better to blend in with the rest of the world	BRI	REM/INT				1	1	1	1					1
		5	2074-01-31		Will China's influence increase from the new Silk Route?	BRI	OPI			1			6			-1				1
		6	2074-01-31		Why is India opposing OBOR?	BRI	OPI			1			12	1					1
		7	2074-02-03		ASEAN can benefit from OBOR	BRI	REM/INT				1		10	1				1
		8	2074-02-04		Bri: A few footnotes	BRI	OPI			1			6	1					1
		9	2074-02-06		G20 and G7 take inspiration from the Silk Road	BRI	OPI			1			13	1				1
	KND	10	2073-12-05		Chances of an agreement with China are low	BRI	NWS	1					2			-1	1
		11	2073-12-08		"One Belt One Road" in the proposal of the United Nations	BRI	NWS	1					12	1				1
		12	2073-12-11		Chinese Defense Minister's Interests: One China Policy and OBOR	BRI	NWS	1					2		1			1
		13	2073-12-12		Nepal participates in One Road One Belt: Dahal	BRI	REM/INT				1		3	1				1
		14	2073-12-13		Nepal's signature ahead of the Ober conference	BRI	REM/INT				1	1	1	1				1
		15	2073-12-18		OBOR and Nepal-China relations	BRI	OPI			1			6		1					1
		16	2074-01-06		Connecting South Asia from Kerung to China	BRI	NWS	1					3	1					1
		17	2074-01-15		Nepal is the hub of South Asia through OBOR	BRI	NWS	1					16	1					1
		18	2074-01-18		Fixed signature on OBOR	BRI	NWS	1				1	1	1					1
		19	2074-01-29		OBOR Conference and Nepal	BRI	OPI			1			6	1				1
		20	2074-01-30		Singed on OBOR with photo-1,2	BRI	NWS	1				1	1		1		1
		21	2074-01-31		Bri conference begins	BRI	NWS	1					10		1		1
		22	2074-02-02		Next priority project selection-6	BRI	EDI		1				6		1				1
		23	2074-02-02		The meaning of the signature in OBOR-6	BRI	OPI			1			6		1				1
		24	2074-02-02		Advice from China experts: Take OBOR to implementation	BRI	REM/INT				1		16	1					1
		25	2074-02-03		OBOR is Inspirational: Rodrigo (Philippines president)	BRI	REM/INT				1		12	1			1
		26	2074-02-04		OB Entry Opportunities and Challenges-7	BRI	OPI			1			7	1				1
		27	2074-02-04		OBOR is milestone for Nepal: Speaker -16	BRI	REM/INT				1		16	1					1
		28	2074-02-07		OBOR's objectives and Nepal's priorities	BRI	OPI			1			6			-1			1
		29	2074-02-24		'Belt and Road Initiative' for development and brotherhood: President Xi-18	BRI	REM/INT				1		18	1					1
		30	2074-02-24		Railway project a 'stunning achievement' in Belt and Road	BRI	NWS	1					18	1					1
		31	2/31/74		What to do after joining BRI? 7	BRI	OPI			1			7		1				1
	APND	32	2073-12-01		The Silk Road is gaining momentum-4	BRI	OPI			1			4	1					1
		33	2073-12-08		Resam Marg, Nepal, South Asia	BRI	OPI			1			6	1					1
		34	2073-12-11		Partnership in 'One Belt One Rod'-1	BRI	REM/INT				1	1	1	1				1
		35	2073-12-11		South Asia benefits from One Belt One Road-3	BRI	REM/INT				1		3	1				1
		36	2073-12-25		Nepal should go to 'Belt and Road'	BRI	OPI			1			6	1					1
		37	2074-01-04		Controlled Instablility: India did not like that China was trying to bring a train to Lumbini	BRI	OPI			1			6		1					1
		38	2074-01-17		Nepal at the OBOR Summit: Prepared to be signed by the Finance Minister	BRI	NWS	1				1	1	1				1
		39	2074-01-19		The 'Great-Game' and the Belt and Road Strategy	BRI	OPI			1			6			-1				1
		40	2074-01-23		India-China is connecting	BRI	OPI			1			7	1					1
		41	2074-01-26		Nepal is becoming a member of OBOR this week	BRI	NWS	1					2	1				1
		42	2074-01-30		Signed in OBOR	BRI	NWS	1					3		1		1
		43	2074-01-31		Finance Minister for OBOR in China	BRI	NWS	1					3		1			1
		44	2074-02-03		OBOR-	BRI	EDI		1				6		1				1
		45	2074-02-03		OBOR Project Inspiration for ASEAN: President Rodrigo	BRI	REM/INT				1		12	1					1
		46	2074-02-06		Signing One Belt One Road is according to Nepal's interests	BRI	NWS	1					3		1			1
		47	2074-02-19		Chinese-invested railways in Nairobi	BRI	NWS	1					9	1					1
		48	2074-02-28		Success of OBOR depends on China: JNU Prof	BRI	REM/INT				1		2			-1			1
		49	2074-03-13		Mechanism to execute the Bri	BRI	NWS	1				1	1	1					1
		50	2074-03-23		Belt and Road New Opportunities-3	BRI	REM/INT				1		3	1					1
		Total
			OPI	18
			EDI	2
			NWS	17
			REM/INT	13
			Total cont.	50
		NPND		9
			NWS	1
			EDI
			OPI	6
			REM/INT	2
		KND		22
			NWS	9
			EDI	1
			OPI	6
			REM/INT	6
		APND		19
			NWS	7
			EDI	1
			OPI	6
			REM/INT	5

## Sheet: BRI edi, opi
		NPND
	1	1	2073-12-10		These forums, these weapons of power	1	OPI
	2	2	2073-12-11		Prime Minister on China visit	1	EDI
	3	3	2073-12-11		Nepalese opportunity in Boao	1	OPI
	4	5	2073-12-18		Should we think 'One Nepal policy'?	1	OPI
	5	8	2073-12-26		India should also participate in OBOR	1	OPI
	6	14	2074-01-08		Why does Nepal not learn from China?	1	OPI
	7	15	1974-01-23		State influence in Chinese banks	1	OPI
	8	19	2074-01-31		Will China's influence increase from the new Silk Route?	1	OPI
	9	21	2074-01-31		Why is India opposing OBOR?	1	OPI
	10	25	2074-02-02		China's major economic challenges	1	OPI
	11	27	2074-02-04		Bri: A few footnotes	1	OPI
	12	28	2074-02-06		G20 and G7 take inspiration from the Silk Road	1	OPI
	13	30	2074-03-02		America and China can cheat the Thucydides Trap?	1	OPI
	14	4	2073-12-04		Uttarayana of Prachanda	1	OPI
	15	10	2073-12-08		China visit: the beginning of a balanced relationship?	1	OPI
	16	12	2073-12-09		An unprepared visit o prachanda	1	OPI
	17	14	2073-12-10		China is interested in the West!	1	OPI
	18	27	2073-12-13		Prime Minister's China visit and about to expertise	1	OPI
	19	29	2073-12-14		Nepal-China Military Diplomacy-7	1	OPI
	20	33	2073-12-18		OBOR and Nepal-China relations	1	OPI
	21	36	2073-12-26		How much do we know about China?	1	OPI
	22	45	2074-01-10		Prachanda's examination after visiting China	1	OPI
	23	50	2074-01-29		OBOR Conference and Nepal	1	OPI
	24	57	2074-02-01		Aspire to lead the world-7	1	OPI
	25	58	2074-02-02		Next priority project selection-6	1	EDI
	26	59	2074-02-02		The meaning of the signature in OBOR-6	1	OPI
	27	63	2074-02-04		OB Entry Opportunities and Challenges-7	1	OPI
	28	65	2074-02-07		OBOR's objectives and Nepal's priorities	1	OPI
	29	66	2074-02-09		How will the local government connect with Obor?	1	OPI
	30	67	2074-02-12		Nepal 2.0, skeptical	1	OPI
	31	74	2/31/74		China's proposals and neighborhood interests-6	1	OPI
	32	75	2/31/74		What to do after joining BRI? 7	1	OPI
	33	86	2074-03-21		The Chinese Experience in Poverty Alleviation-7	1	OPI
	34	88	2074-03-27		The growing problem on the Sino-Indian border	1	OPI
	35	89	2074-03-29		An indication of the Doklam conflict-6	1	OPI
	36	92	2074-03-30		India-China: The Threat of a New Cold War	1	OPI
	37	2	2073-12-01		The Silk Road is gaining momentum-4	1	OPI
	38	7	2073-12-08		Resam Marg, Nepal, South Asia	1	OPI
	39	9	2073-12-09		China visit-6	1	EDI
	40	10	2073-12-09		After Chou An apologized	1	OPI
	41	22	2073-12-16		China visit	1	EDI
	42	25	2073-12-21		A nominal prime minister	1	OPI
	43	27	2073-12-25		Nepal should go to 'Belt and Road'	1	OPI
	44	29	2073-12-29		India's New Tibet Policy	1	OPI
	45	31	2074-01-02		A year of diplomatic instability	1	OPI
	46	33	2074-01-04		Controlled Instablility: India did not like that China was trying to bring a train to Lumbini	1	OPI
	47	37	2074-01-19		The 'Great-Game' and the Belt and Road Strategy	1	OPI
	48	40	2074-01-23		India-China is connecting	1	OPI
	49	47	2074-02-03		OBOR-	1	EDI
	50	52	2074-02-14		Regional cold war and turmoil: The new constitution has rejected the reality and heritage of the country	1	OPI
	51	54			Dalai Lama, India and America-6	1	OPI
	52	58	2074-02-22		China's call	1	OPI
	53	59	2074-02-23		Prosperity through companionship with neighbors	1	OPI
	54	64	2074-03-05		A trick to slow down the Budhigandaki	1	OPI
	55	65	2074-03-06		Shanghai Organization and India-6	1	OPI
	56	72	2074-03-14		Budhigandaki project and Gejuwa-7	1	OPI
	57	74	2074-03-20		India-China tension and Nepal-6	1	OPI
	58	79	2074-03-23		Doklam dispute and Nepal-6	1	OPI
	59	82	2074-03-06		American influence to India and china: To depend on another nation is to lose one's independent existence	1	OPI
	60	84	2074-03-30		Nepal in the Indo-China conflict	1	OPI

## Sheet: NPND1
Nepali print media frame about the BRI in 4 months time span during MoU period in 2017 May
		Published date		Heading	Total items	Position	Categories				Page		Tone			frame
	S.N.	Nepali	English				NWS	EDI	OPI	REM/INT	1st PG	PG	Positive	Neutral	Negative	Political	Economic	Infrastructure development	Strategic	Cultural exchange	miscellaneous
	1	2073-12-10	March, 2017	These forums, these weapons of power	BRI	OPI			1			4			-1	1
	2	2073-12-11	March, 2017	Prime Minister on China visit	1	EDI		1				4		1		1
	3	2073-12-11	March, 2017	Nepalese opportunity in Boao	1	OPI			1			4	1				1
	4	2073-12-17	March, 2017	Strengthening trust and understanding with China: Prime Minister	1	REM/INT				1	1	1	1			1
	5	2073-12-18	March, 2017	Should we think 'One Nepal policy'?	1	OPI			1			4			-1	1
	6	2073-12-18	March, 2017	President of China to visit America: It will prove to be a milestone in the development of relations	1	NWS	1					14	1			1
	7	2073-12-25	April, 2017	Five agendas for the Trump-Jinping talks	1	NWS	1					14		1					1
	8	2073-12-26	April, 2017	India should also participate in OBOR	BRI	OPI			1			12	1					1
	9	2073-12-30	April, 2017	Election material coming from China today	1	NWS	1					2		1							1
	10	2073-12-31	April, 2017	Telephone conversation between the presidents of China and the United States: China insists on a peaceful solution to the Pyongyang conflict	1	NWS	1					10	1						1
	11	2074-01-01	April, 2017	North Gate Rasuwagadhi	1	NWS	1					31			-1			1
	12	2074-01-04	April, 2017	Nepal-China Joint Training Begins (Army)	1	NWS	1					2		1					1
	13	2074-01-07	April, 2017	A New Dimension of Nepal-China Relations: Tourism Development	1	REM/INT				1		12	1			1
	14	2074-01-08	April, 2017	Why does Nepal not learn from China?	1	OPI			1			8	1							1
	15	1974-01-23	May, 2017	State influence in Chinese banks	1	OPI			1			12		1			1
	16	2074-01-30	May, 2017	Signing of the One Belt One Rod framework	BRI	NWS	1				1	1	1			1
	17	2074-01-30	May, 2017	About obor: what is it?	1	NWS	1				1	1		1				1
	18	2074-01-30	May, 2017	It's better to blend in with the rest of the world	BRI	REM/INT				1	1	1	1					1
	19	2074-01-31	May, 2017	Will China's influence increase from the new Silk Route?	BRI	OPI			1			6			-1				1
	20	2074-01-31	May, 2017	Welcome reception photos by Primer li to Pakistan prime minister nawaj sarif	1	NWS	1					10	1								1
	21	2074-01-31	May, 2017	Why is India opposing OBOR?	BRI	OPI			1			12	1					1
	22	2074-02-01	May, 2017	China has laid the foundation for cooperation	1	REM/INT				1		10	1				1
	23	2074-02-02	May, 2017	world's most eminent person's conference begins	1	NWS	1					10		1		1
	24	2074-02-02	May, 2017	China's commitment to run railways up to the border of Nepal	1	NWS	1					11	1					1
	25	2074-02-02	May, 2017	China's major economic challenges	1	OPI			1			12			-1		1
	26	2074-02-03	May, 2017	ASEAN can benefit from OBOR	BRI	REM/INT				1		10	1				1
	27	2074-02-04	May, 2017	Bri: A few footnotes	BRI	OPI			1			6	1					1
	28	2074-02-06	May, 2017	G20 and G7 take inspiration from the Silk Road	BRI	OPI			1			13	1				1
	29	2074-03-01	June, 2017	Chinese investors attracted to hospitality industry: commitment to invest more than three billion	1	NWS	1					13	1				1
	30	2074-03-02	June, 2017	America and China can cheat the Thucydides Trap?	1	OPI			1			6			-1				1
	31	2074-03-06	June, 2017	Nepal-China Foreign Secretary level meeting	1	NWS	1					2		1		1
	32	2074-03-07	June, 2017	Nepal-China Foreign Secretary level meeting held: Agreed to implement the agreement	1	NWS	1					2		1		1
	33	2074-03-07	June, 2017	China's distance with Kathmandu is getting closer	1	NWS	1					2	1					1
	34	2074-03-14	June, 2017	Nepal should benefit from China and India: Expert	1	REM/INT				1		12		1			1
	35	2074-03-17	July, 2027	Armed Police Academy was established in two and a half years of the agreement with China: The police academy to be built by India has been stalled for 20 years.	1	NWS	1					2	1						1
	36	2074-03-17	July, 2027	Chinese arrested with 1 crore Buddha's mind	1	NWS	1					2			-1						1
	37	2074-03-17	July, 2027	India-China border dispute	1	NWS	1					10			-1				1
	Total				28		18	1	12	6	4		19	10	-8	10	8	8	7	1	3	0
	Percentage				100		64.2857	3.57143	42.8571	21.4286	14.2857		67.8571	35.7143	-28.5714	35.7143	28.5714	28.5714	25	3.57143	10.7143
			Date	No of Published Media Contents (NPND)	NWS	Edi	OPI	INT/REM
			March, 2017	6
			April, 2017	8
			May, 2017	14
			June, 2017	6
			July, 2017	3
			Total	37

## Sheet: KND1
		Date		Heading	Total iteams	Position	Categories				Page		Tone			frame
	S.N.	Nepali	English				NWS	EDI	OPI	REM/INT	1st PG	PG	Positive	Neutral	Negative	Political	Economic	Infrastructure development	Strategic	Cultural exchange	miscellaneous
	1	2073-12-01	March, 2017	Dahal is preparing to go to China, the Chinese Defense Minister is coming to Nepal	1	NWS	1					2		1		1
	2	2073-12-03	March, 2017	Weak preparations for the visit to China	1	REM/INT				1		3			-1			1
	3	2073-12-04	March, 2017	The visit of the Prime Minister to China will be official	1	NWS	1					4	1			1
	4	2073-12-04	March, 2017	Uttarayana of Prachanda	1	OPI			1			7			-1	1
	5	2073-12-05	March, 2017	Chances of an agreement with China are low	BRI	NWS	1					2			-1	1
	6	2073-12-05	March, 2017	Cooperation is needed to overcome the discomfort: Chinese ambassador	1	REM/INT				1		2	1			1
	7	2073-12-05	March, 2017	Chinese subsidized salt warehouse: because of branding	1	NWS	1					13			-1		1
	8	2073-12-07	March, 2017	There is no justification for the new agreement: expert	1	REM/INT				1		9			-1	1
	9	2073-12-08	March, 2017	The Prime Minister will hold a meeting with the Chinese President	1	NWS	1					3	1			1
	10	2073-12-08	March, 2017	China visit: the beginning of a balanced relationship?	1	OPI			1			6			-1				1
	11	2073-12-08	March, 2017	"One Belt One Road" in the proposal of the United Nations	BRI	NWS	1					12	1				1
	12	2073-12-09	March, 2017	An unprepared visit o prachanda	1	OPI			1			7			-1	1
	13	2073-12-10	March, 2017	PM's visit to China will be fruitful: Foreign Minister Mahat	1	REM/INT				1	1	1	1			1
	14	2073-12-10	March, 2017	China is interested in the West!	1	OPI			1			7			-1				1
	15	2073-12-11	March, 2017	Prime Minister toward China: Dahal's commitment to remove the latest scandal from the tour	1	NWS	1					2			-1	1
	16	2073-12-11	March, 2017	Chinese Defense Minister's Interests: One China Policy and OBOR	BRI	NWS	1					2		1			1
	17	2073-12-11	March, 2017	Nepal becomes Switzerland: Chinese expert	1	REM/INT				1		2	1				1
	18	2073-12-11	March, 2017	Trade and supply agenda at low priority	1	NWS	1					15			-1		1
	19	2073-12-12	March, 2017	The Prime Minister arrived in China	1	NWS	1					3		1		1
	20	2073-12-12	March, 2017	Nepal participates in One Road One Belt: Dahal	BRI	REM/INT				1		3	1				1
	21	2073-12-12	March, 2017	Let's not allow anti-China movement	1	NWS	1					3	1						1
	22	2073-12-12	March, 2017	Suggestion to proceed with the bri contract	1	NWS	1					3	1				1
	23	2073-12-13	March, 2017	Nepal's signature ahead of the Ober conference	BRI	REM/INT				1	1	1	1				1
	24	2073-12-13	March, 2017	At the BOAO Forum, the Prime Minister said: Asia is the economic hub of the world	1	REM/INT				1		2	1				1
	25	2073-12-13	March, 2017	Prime Minister in Beijing	1	NWS	1					2		1							1
	26	2073-12-13	March, 2017	Chinese defense minister returned	1	NWS	1					3		1					1
	27	2073-12-13	March, 2017	Prime Minister's China visit and about to expertise	1	OPI			1			6		1		1
	28	2073-12-14	March, 2017	China insists on Nepal's participation in OBOR	1	NWS	1					3			-1				1
	29	2073-12-14	March, 2017	Nepal-China Military Diplomacy-7	1	OPI			1			7		1					1
	30	2073-12-15	March, 2017	China's concern in implementing the Constitution	1	NWS	1				1	1			-1	1
	31	2073-12-16	March, 2017	Photo pm retuna	1	NWS	1				1	1		1							1
	32	2073-12-17	March, 2017	Prime Minister's visit to China: What has been achieved?	1	NWS	1					9			-1			1
	33	2073-12-18	March, 2017	OBOR and Nepal-China relations	BRI	OPI			1			6		1					1
	34	2073-12-20	April, 2017	Beards are banned in China	1	NWS	1					11			-1					1
	35	2073-12-21	April, 2017	Sino-Indian relations have got cold	1	NWS	1					18		1					1
	36	2073-12-26	April, 2017	How much do we know about China?	1	OPI			1			kha	1							1
	37	2073-12-27	April, 2017	"American Dream of Chinese Youth"	1	NWS	1					10			-1					1
	38	2074-01-01	April, 2017	Nepal-China joint military exercise the day after tomorrow	1	NWS	1				1	1		1					1
	39	2074-01-04	April, 2017	Nepal-China joint military exercise begins	1	NWS	1					2		1					1
	40	2074-01-05	April, 2017	Apples decay in the kerung	1	NWS	1					18			-1		1
	41	2074-01-06	April, 2017	Connecting South Asia from Kerung to China	BRI	NWS	1					3	1					1
	42	2074-01-08	April, 2017	OBOR 'signs with conditions'	1	NWS	1				1	1		1				1
	43	2074-01-08	April, 2017	Consulate office open in Guangzhou	1	NWS	1					3		1				1
	44	2074-01-10	April, 2017	China is always with Nepali people in difficulty	1	REM/INT				1		2	1			1
	45	2074-01-10	April, 2017	Prachanda's examination after visiting China	1	OPI			1			7	1				1
	46	2074-01-15	April, 2017	Nepal is the hub of South Asia through OBOR	BRI	NWS	1					16	1					1
	47	2074-01-18	May, 2017	China should put pressure on North Korea-turmp	1	NWS	1					10			-1				1
	48	2074-01-18	May, 2017	Fixed signature on OBOR	BRI	NWS	1				1	1	1					1
	49	2074-01-27	May, 2017	'Rail-link' required along with signature on obor	1	NWS	1					2		1				1
	50	2074-01-29	May, 2017	OBOR Conference and Nepal	BRI	OPI			1			6	1				1
	51	2074-01-30	May, 2017	Singed on OBOR with photo-1,2	BRI	NWS	1				1	1		1		1
	52	2074-01-30	May, 2017	Got along with good neighbors:China	1	REM/INT				1	1	1	1			1
	53	2074-01-30	May, 2017	'Border seal' stranded Nepalese in Chinese territory-12	1	NWS	1					12			-1						1
	54	2074-01-31	May, 2017	Signed two more agreements with China today	1	NWS	1					2		1				1
	55	2074-01-31	May, 2017	Bri conference begins	BRI	NWS	1					10		1		1
	56	2074-02-01	May, 2017	Nepal's proposal with China: Connect Kathmandu on rail link-2	1	NWS	1					2		1				1
	57	2074-02-01	May, 2017	Aspire to lead the world-7	1	OPI			1			7	1				1
	58	2074-02-02	May, 2017	Next priority project selection-6	BRI	EDI		1				6		1				1
	59	2074-02-02	May, 2017	The meaning of the signature in OBOR-6	BRI	OPI			1			6		1				1
	60	2074-02-02	May, 2017	Advice from China experts: Take OBOR to implementation	BRI	REM/INT				1		16	1					1
	61	2074-02-03	May, 2017	OBOR is Inspirational: Rodrigo (Philippines president)	BRI	REM/INT				1		12	1			1
	62	2074-02-03	May, 2017	China will build an industrial park in Damak-17	1	NWS	1					17	1					1
	63	2074-02-04	May, 2017	OB Entry Opportunities and Challenges-7	BRI	OPI			1			7	1				1
	64	2074-02-04	May, 2017	OBOR is milestone for Nepal: Speaker -16	BRI	REM/INT				1		16	1					1
	65	2074-02-07	May, 2017	OBOR's objectives and Nepal's priorities	BRI	OPI			1			6			-1			1
	66	2074-02-09	May, 2017	How will the local government connect with Obor?	1	OPI			1			7	1					1
	67	2074-02-12	May, 2017	Nepal 2.0, skeptical	1	OPI			1			6	1				1
	68	2074-02-24	June, 2017	India and China congratulate Deuba-3	1	NWS	1					3		1							1
	69	2074-02-24	June, 2017	'Belt and Road Initiative' for development and brotherhood: President Xi-18	BRI	REM/INT				1		18	1					1
	70	2074-02-24	June, 2017	'Railway project a 'stunning achievement' in Belt and Road-18	BRI	NWS	1					18	1					1
	71	2074-02-24	June, 2017	A Chinese mobile internet company will change the world's digital culture-18	1	NWS	1					18		1						1
	72	2074-02-28	June, 2017	Promotion of tourism in Guangzhou and Chengdu-2	1	NWS	1					2		1						1
	73	2074-02-28	June, 2017	China hosts the World Cup:	1	NWS	1					18	1							1
	74	2/31/74	June, 2017	China's proposals and neighborhood interests-6	1	OPI			1			6			-1				1
	75	2/31/74	June, 2017	What to do after joining BRI? 7	BRI	OPI			1			7		1				1
	76	2074-03-02	June, 2017	The Nepal-China mechanism meeting could not be held	1	NWS	1					13			-1	1
	77	2074-03-04	June, 2017	Looking at India and China, we can become a model of development	1	REM/INT				1		7		1				1
	78	2074-03-05	June, 2017	Chinese ambassador met with Dahal and Oli	1	NWS	1					2		1		1
	79	2074-03-07	June, 2017	China positive on easy 'connectivity'-3	1	NWS	1					3	1					1
	80	2074-03-08	June, 2017	After the opening of the Corolla checkpoint, there is a rush at the border-17	1	NWS	1					17	1							1
	81	2074-03-08	June, 2017	Relationships in a new frame: assistant fore. minister. Gung senyu-18	1	REM/INT				1		18	1			1
	82	2074-03-11	June, 2017	120 missing in landslides in China	1	NWS	1					14			-1						1
	83	2074-03-13	June, 2017	XI's book breaks records	1	NWS	1					12	1							1
	84	2074-03-18	July, 2017	Chinese President's Warning: 'Attempts to challenge Beijing are unacceptable'	1	NWS	1					11		1					1
	85	2074-03-21	July, 2017	Vice President to China-2	1	NWS	1					2		1						1
	86	2074-03-21	July, 2017	The Chinese Experience in Poverty Alleviation-7	1	OPI			1			7	1				1
	87	2074-03-25	July, 2017	India-China-Bhutan border dispute: 'Doklam not military, political hall'	1	NWS	1					12		1					1
	88	2074-03-27	July, 2017	The growing problem on the Sino-Indian border	1	OPI			1			6		1						1
	89	2074-03-29	July, 2017	An indication of the Doklam conflict-6	1	OPI			1			6		1					1
	90	2074-03-29	July, 2017	China sent troops to Djibouti-12	1	NWS	1					12			-1				1
	91	2074-03-29	July, 2017	Trilateral military exercises in the Indian Ocean	1	NWS	1					12		1					1
	92	2074-03-30	July, 2017	India-China: The Threat of a New Cold War	1	OPI			1			7			-1				1
	93	2074-03-31	July, 2017	International condemnation of China	1	NWS	1					10			-1	1
	Total				71		54	1	22	16	9		35	33	-25	22	16	22	18	10	5
	percentage						76.0563	1.40845	30.9859	22.5352	12.6761		49.2958	46.4789	-35.2113	30.9859	22.5352	30.9859	25.3521	14.0845	7.04225
			Date	No of Published Media Contents (KND)
			March, 2017	33
			April, 2017	13
			May, 2017	21
			June, 2017	16
			July, 2017	10
			Total	93

## Sheet: APND1
				Nepali print media frame about the BRI in 4 months time span during MoU period in 2017 May +ve=1,-ve=-1 and neutral=0
		Date		Heading		Position	Categories				Page		Tone			frame		frame	frame	frame
	S.N.	Nepali	English		Total items		NWS	EDI	OPI	REM/INT	1st PG	PG	Positive	Neutral	Negative	Political	Economic	Infrastructure development	Strategic	Cultural exchange	miscellaneous
	1	2073-12-01	March, 2017	The Prime Minister is going to China today	1	NWS	1				1	1		1		1
	2	2073-12-01	March, 2017	The Silk Road is gaining momentum-4	BRI	OPI			1			4	1					1
	3	2073-12-02	March, 2017	Bharatpur-Bardghat transmission line unscheduled: Chinese contractor's negligence-1	1	NWS	1				1	1			-1			1
	4	2073-12-03	March, 2017	Claims to have saved India-China from conflict: Baburam Bhattarai	1	REM/INT				1		3		1					1
	5	2073-12-05	March, 2017	Dahal-XI meeting scheduled: The Prime Minister will go to Beijing on the 10th of Chaitra, meet Xi on the 11th, and go to Boao on the 12th-1	1	NWS	1				1	1		1							1
	6	2073-12-07	March, 2017	Preparations for the visit to China are weak: foreign affairs Experts	1	REM/INT				1		3			-1		1
	7	2073-12-08	March, 2017	Resam Marg, Nepal, South Asia	BRI	OPI			1			6	1					1
	8	2073-12-09	March, 2017	The Prime Minister is going to China with a 15-member team-2	1	NWS	1				1	1			-1					1
	9	2073-12-09	March, 2017	China visit-6	1	EDI		1				6		1		1
	10	2073-12-09	March, 2017	After Chou An apologized	1	OPI			1			6			-1	1
	11	2073-12-10	March, 2017	There will be no agreement on the Prime Minister's visit to China-3	1	NWS	1					3			-1	1
	12	2073-12-10	March, 2017	Chinese Defense Minister is coming to Nepal-3	1	NWS	1					3		1					1
	13	2073-12-11	March, 2017	Prime Minister towards China: Chinese Defense Minister in Kathmandu-1	1	NWS	1				1	1			-1				1
	14	2073-12-11	March, 2017	Partnership in 'One Belt One Rod'-1	BRI	REM/INT				1	1	1	1				1
	15	2073-12-11	March, 2017	South Asia benefits from One Belt One Road-3	BRI	REM/INT				1		3	1				1
	16	2073-12-12	March, 2017	Chinese formula: The solution in parties' concensus-1	1	NWS	1				1	1			-1	1
	17	2073-12-13	March, 2017	PM dahal in Beijing	1	NWS	1					2		1							1
	18	2073-12-14	March, 2017	PM-XI meeting today: 'The change of government has not affected the relationship with China': dahal	1	REM/INT				1		3	1						1
	19	2073-12-15	March, 2017	Let's increase faith-XI; Let's work together in international and regional affairs - Dahal	1	REM/INT				1	1	1		1					1
	20	2073-12-16	March, 2017	China wants elections soon: Mahat-1	1	REM/INT				1	1	1			-1	1
	21	2073-12-16	March, 2017	China will build a consulate office in Lahsa-2	1	NWS	1					2	1				1
	22	2073-12-16	March, 2017	China visit	1	EDI		1				6		1				1
	23	2073-12-17	March, 2017	'Chinese desire stability'-1 pm remark	1	REM/INT				1	1	1	1			1
	24	2073-12-17	March, 2017	Promotion of Chinese tourism in Pokhara-kha	1	NWS	1					kha	1							1
	25	2073-12-21	April, 2017	A nominal prime minister	1	OPI			1			7			-1		1
	26	1973-12-24	April, 2017	Dalai Lama's visit to Arunachal: 'Shock in Sino-Indian Relations'	1	REM/INT				1		12			-1				1
	27	2073-12-25	April, 2017	Nepal should go to 'Belt and Road'	BRI	OPI			1			6	1					1
	28	2073-12-26	April, 2017	Chinese Film Festival in Kathmandu	1	NWS	1					12		1						1
	29	2073-12-29	April, 2017	India's New Tibet Policy	1	OPI			1			6	1						1
	30	2074-01-01	April, 2017	Nepal-China joint military exercise on Sunday	1	NWS	1					3			-1				1
	31	2074-01-02	April, 2017	A year of diplomatic instability	1	OPI			1			7			-1	1
	32	2074-01-03	April, 2017	Chinese soldiers arrived in Kathmandu	1	NWS	1					3		1					1
	33	2074-01-04	April, 2017	Controlled Instablility: India did not like that China was trying to bring a train to Lumbini	BRI	OPI			1			6		1					1
	34	2074-01-13	April, 2017	Nepal-China joint military training is over	1	NWS	1					2		1					1
	35	2074-01-16	April, 2017	Proposal to connect Chinese rail to Lumbini	1	NWS	1					3	1					1
	36	2074-01-17	April, 2017	Nepal at the OBOR Summit: Prepared to be signed by the Finance Minister	BRI	NWS	1				1	1	1				1
	37	2074-01-19	May, 2017	The 'Great-Game' and the Belt and Road Strategy	BRI	OPI			1			6			-1				1
	38	2074-01-21	May, 2017	Communist leaders help the Dalai Lama	1	REM/INT				1		12			-1	1
	39	2074-01-22	May, 2017	A market dependent on mobiles imported from China	1	NWS	1					Gha			-1		1
	40	2074-01-23	May, 2017	India-China is connecting	BRI	OPI			1			7	1					1
	41	2074-01-26	May, 2017	Nepal is becoming a member of OBOR this week	BRI	NWS	1					2	1				1
	42	2074-01-29	May, 2017	Dalai Lama- American MPs meet China's objection	1	REM/INT				1		9			-1				1
	43	2074-01-30	May, 2017	Signed in OBOR	BRI	NWS	1					3		1		1
	44	2074-01-31	May, 2017	Finance Minister for OBOR in China	BRI	NWS	1					3		1			1
	45	2074-02-01	May, 2017	China is happy about the election	1	NWS	1							1		1
	46	2074-02-02	May, 2017	The prominent person of the world in Beijing	1	NWS	1					12,	1			1
	47	2074-02-03	May, 2017	OBOR-	BRI	EDI		1				6		1				1
	48	2074-02-03	May, 2017	OBOR Project Inspiration for ASEAN: President Rodrigo	BRI	REM/INT				1		12	1					1
	49	2074-02-06	May, 2017	Signing One Belt One Road is according to Nepal's interests	BRI	NWS	1					3		1			1
	50	2074-02-07	May, 2017	Gautam Budh Airport construction delayed: Chinese company in action	1	NWS	1					6			-1			1
	51	2074-02-08	May, 2017	Very Corridor connecting China and India	1	NWS	1					Ga	1					1
	52	2074-02-14	May, 2017	Regional cold war and turmoil: The new constitution has rejected the reality and heritage of the country	1	OPI			1			6			-1				1
	53	2074-02-16	May, 2017	Equal relations with China and India	1	NWS	1					2		1					1
	54		May, 2017	Dalai Lama, India and America-6	1	OPI			1			6			-1				1
	55	2074-02-17	May, 2017	Chinese cooperation in cross-border development	1	NWS	1				1	1	1					1
	56	2074-02-19	June, 2017	Chinese-invested railways in Nairobi	BRI	NWS	1					9	1					1
	57	2074-02-20	June, 2017	Strong relations with neighbors	1	REM/INT				1		3		1		1
	58	2074-02-22	June, 2017	China's call	1	OPI			1			7			-1				1
	59	2074-02-23	June, 2017	Prosperity through companionship with neighbors	1	OPI			1			7		1		1
	60	2074-02-24	June, 2017	Nepal-China cooperation progressed	1	NWS	1					11	1			1
	61	2074-02-25	June, 2017	We want to work with the new government: china	1	REM/INT				1		2	1			1
	62	2074-02-28	June, 2017	Success of OBOR depends on China: JNU Prof	BRI	REM/INT				1		2			-1			1
	63	2074-03-03	June, 2017	Nepal-China meeting within the week	1	NWS	1					2		1		1
	64	2074-03-05	June, 2017	A trick to slow down the Budhigandaki	1	OPI			1			7			-1			1
	65	2074-03-06	June, 2017	Shanghai Organization and India-6	1	OPI			1			6,		1			1
	66	2074-03-06	June, 2017	A quarter billion investment commitment from the new Asian Infrastructure Bank	1	NWS	1					ka	1				1
	67	2074-03-07	June, 2017	Kerung in four hours!-1	1	NWS	1				1	1	1					1
	68	2074-03-07	June, 2017	flight of Tibet Airlines to Kathmandu begins	1	NWS	1					ka	1							1
	69	2074-03-12	June, 2017	Xi Visiting Hong Kong	1	NWS	1					12		1		1
	70	2074-03-13	June, 2017	The Chinese were difficulty to enter Nepal	1	NWS	1					11		1						1
	71	2074-03-13	June, 2017	Mechanism to execute the Bri	BRI	NWS	1				1	1	1					1
	72	2074-03-14	June, 2017	Budhigandaki project and Gejuwa-7	1	OPI			1			7			-1			1
	73	2074-03-14	June, 2017	Remove Indian Army from Nathula: China	1	NWS	1					12	1						1
	74	2074-03-20	July, 2017	India-China tension and Nepal-6	1	OPI			1			6			-1				1
	75	2074-03-20	July, 2017	THEAD threatens China and Russia: Xi Jinping-12	1	REM/INT				1		12			-1				1
	76	2074-03-21	July, 2017	We failed to take advantage of our neighbors: Mahara	1	REM/INT				1		3		1			1
	77	2074-03-22	July, 2017	Why did the dispute flare up on the India-China border?	1	NWS	1					12			-1				1
	78	2074-03-23	July, 2017	Belt and Road New Opportunities-3	BRI	REM/INT				1		3	1					1
	79	2074-03-23	July, 2017	Doklam dispute and Nepal-6	1	OPI			1			6	1						1
	80	2074-03-25	July, 2017	'Nepal need not panic' about India-China tension-3	1	REM/INT				1		3	1			1
	81	2074-03-25	July, 2017	Vice President in Yenan, China-2	1	NWS	1					2		1							1
	82	2074-03-06	July, 2017	American influence to India and china: To depend on another nation is to lose one's independent existence	1	OPI			1			6			-1	1
	83	2074-03-27	July, 2017	India tried to make Nepal Sikkim	1	NWS	1					3	1						1
	84	2074-03-30	July, 2017	Nepal in the Indo-China conflict	1	OPI			1			7		1					1
	85		July, 2017	Nobel Prize Winner Liu Dies-9	1	NWS	1					9			-1	1
	Total				66		42	3	21	19	14		30	27	-28	21	13	19	24	5	3
	percetage						49.4118	3.52941	24.7059	22.3529	16.4706		35.2941	31.7647	-32.9412	24.7059	15.2941	22.3529	28.2353	5.88235	3.52941
			Date	No of Published Media Contents (APND)
			March, 2017	24
			April, 2017	12
			May, 2017	19
			June, 2017	18
			July, 2017	12
			Total	85

## Sheet: Stratified data
		China and BRI Heading tone
	News paper	Theme	NWS			EDI			OPI			REM/INT
			Positive	Neutral	Negative	Positive	Neutral	Negative	Positive	Neutral	Negative	Positive	Neutral	Negative	Total
	NPND	Political	2	3	0	0	1	0	0	0	2	2	0	0	10
		Economic	1	0	0	0	0	0	2	1	1	2	1	0	8
		Inf&Dev	2	1	1	0	0	0	3	0	0	1	0	0	8
		Strategic	2	2	1	0	0	0	0	0	2	0	0	0	7
		Cultural	0	0	0	0	0	0	1	0	0	0	0	0	1
		miscellaneous	1	1	1	0	0	0	0	0	0	0	0	0	3
		Total	8	7	3	0	1	0	6	1	5	5	1	0	37
	News paper	Theme	NWS			EDI			OPI			REM/INT
			Positive	Neutral	Negative	Positive	Neutral	Negative	Positive	Neutral	Negative	Positive	Neutral	Negative	Total
	KND	Political	2	5	6	0	0	0	0	1	2	6	0	0	22
		Economic	3	1	3	0	0	0	6	0	0	3	0	0	16
		Inf&Dev	6	5	1	0	1	0	1	2	1	3	1	1	22
		Strategic	1	7	3	0	0	0	0	3	4	0	0	0	18
		Cultural	3	3	2	0	0	0	1	1	0	0	0	0	10
		miscellaneous	0	3	2	0	0	0	0	0	0	0	0	0	5
		Total	15	24	17	0	1	0	8	7	7	12	1	1	93
	News paper	Theme	NWS			EDI			OPI			REM/INT
			Positive	Neutral	Negative	Positive	Neutral	Negative	Positive	Neutral	Negative	Positive	Neutral	Negative	Total
	APND	Political	2	5	3	0	1	0	0	1	3	3	1	2	21
		Economic	4	2	1	0	0	0	0	1	1	2	1	1	13
		Inf&Dev	6	0	2	0	2	0	4	0	2	2	0	1	19
		Strategic	2	4	3	0	0	0	2	2	5	1	2	3	24
		Cultural	2	2	1	0	0	0	0	0	0	0	0	0	5
		miscellaneous	0	3	0	0	0	0	0	0	0	0	0	0	3
		Total	16	16	10	0	3	0	6	4	11	8	4	7	85
	Paper/Tone	Categories	Positive	Neutral	Negative	Total
	NPND	NWS	8	7	3	18
		EDI	0	1	0	1
		OPI	6	1	5	12
		INT/REM	5	1	0	6
		Total	19	10	8	37
	Paper/Tone	Categories	Positive	Neutral	Negative	Total
	KND	NWS	15	24	17	56
		EDI	0	1	0	1
		OPI	8	7	7	22
		INT/REM	12	1	1	14
		Total	35	33	25	93
	Paper/Tone	Categories	Positive	Neutral	Negative	Total
	APND	NWS	16	16	10	42
		EDI	0	3	0	3
		OPI	6	4	11	21
		INT/REM	8	4	7	19
		Total	30	27	28	85
								E
	Paper/Tone	Theme	Positive	Neutral	Negative	Total		Ve+	Ve+-	Ve-	total	x^2= (O-E)^2/E			Total	df	P=
	NPND	Political	4	4	2	10		5.13514	2.7027	2.16216	10	0.250925	0.622703	0.0121622	0.885789	10	0.999899
		Economic	5	2	1	8		4.10811	2.16216	1.72973	8	0.193634	0.0121622	0.307855	0.513651	10	0.999899
		Inf&Dev	6	1	1	8		4.10811	2.16216	1.72973	8	0.871266	0.624662	0.307855	1.80378	10	0.999899
		Stratetic	2	2	3	7		3.59459	1.89189	1.51351	7	0.707377	0.00617761	1.45994	2.1735	10	0.999899
		Cultural	1	0	0	1		0.513514	0.27027	0.216216	1	0.460882	0.27027	0.216216	0.947368	10	0.999899
		miscellaneous	1	1	1	3		1.54054	0.810811	0.648649	3	0.189663	0.0441441	0.190315	0.424123	10	0.999899
		Total	19	10	8	37						2.67375	1.58012	2.49435	6.74821	10	0.999899
	Paper/Tone	Theme	Positive	Neutral	Negative	Total
	KND	Political	8	6	8	22
		Economic	12	1	3	16
		Inf&Dev	10	9	3	22
		Stratetic	1	10	7	18
		Cultural	4	4	2	10
		miscellaneous	0	3	2	5
		Total	35	33	25	93
	Paper/Tone	Theme	Positive	Neutral	Negative	Total
	APND	Political	5	8	8	21
		Economic	6	4	3	13
		Inf&Dev	12	2	5	19
		Stratetic	5	8	11	24
		Cultural	2	2	1	5
		miscellaneous	0	3	0	3
		Total	30	27	28	85
	Frame		NPND		KND			APND
		No.	Percentage	No.	Percentage	No.	Percentage	Total No.	%	Positive	Neutral	Negative
	Political	10	0.27027	22	0.24	21	0.25	53	0.246512	17	18	18
	Economic	8	0.216216	16	0.17	13	0.15	37	0.172093	23	7	7
	INF&DEV	8	0.216216	22	0.24	19	0.22	49	0.227907	28	12	9
	Strategic	7	0.189189	18	0.19	24	0.28	49	0.227907	8	20	21
	Cultural	1	0.027027	10	0.11	5	0.06	16	0.0744186	7	6	3
	miscellaneous	3	0.0810811	5	0.05	3	0.04	11	0.0511628	1	7	3
		37	1	93	1	85	1	215	1	84	70	61
	Total
		N/C	NWS	EDI	OPI	REM/INT	Total
		NPND	18	1	12	6	37
		KND	56	1	22	14	93
		APND	42	3	21	19	85
		Total	116	5	55	39	215
	Total
		T/C	NWS	EDI	OPI	REM/INT	Total	%
		Positve	39	0	20	25	84	0.390698
		Neutral	47	5	12	6	70	0.325581
		Negative	30	0	23	8	61	0.283721
		Total	116	5	55	39	215	1
	Total
		F/C	NWS	EDI	OPI	REM/INT	Total	%
		Political	28	2	9	14	53	0.246512
		Economic	15	0	12	10	37	0.172093
		Inf&Dev	24	3	13	9	49	0.227907
		Strategic	25	0	18	6	49	0.227907
		Cultural	13	0	3	0	16	0.0744186
		miscellaneous	11	0	0	0	11	0.0511628
		Total	116	5	55	39	215	1
	Total	Newpapr	Tone					Expected					(0-E)^2/E			X^2
		N/T	Positive	Neutral	Negative	R.Total		N/T	Positive	Neutral	Negative	N/T	Positive	Neutral	Negative		df
		NPND	19	10	8	37		NPND	14.4558	12.0465	10.4977	NPND	1.42847	0.34767	0.594263	2.3704
		KND	35	33	25	93		KND	36.3349	30.2791	26.386	KND	0.0490414	0.244508	0.0728084	0.366357	4
		APND	30	27	28	85		APND	33.2093	27.6744	24.1163	APND	0.310143	0.0164354	0.62544	0.952018	4
		C.Total	84	70	61	215							1.78765	0.608613	1.29251	3.68877	4
														x2	3.69
				(c-1)*(R-1)										df	4
			Df	4										p	0.449582
			Chi squar(X2	3.68877
			df	4
			p=													o-e
		Observed										Expected	RT*CT/GT			Positive			(o-e)^2			o-e^2/e
		F/N	NPND	KND	APND	%	Positive	Neutral	Negative	RT	F/N	Positive	Neutral	Negative		-3.70698	Neutral	Negative	Positive	Neutral	Negative				total	P value
		Political	10	22	21	0.246512	17	18	18	53	Political	20.707	17.2558	15.0372		8.54419	0.744186	2.96279	13.7417	0.553813	8.77813	0.663625	0.0320943	0.58376	1.27948
		Economic	8	16	13	0.172093	23	7	7	37	Economic	14.4558	12.0465	10.4977		8.85581	-5.04651	-3.49767	73.0031	25.4673	12.2337	5.05009	2.11408	1.16537	8.32954
		INF&DEV	8	22	19	0.227907	28	12	9	49	INF&DEV	19.1442	15.9535	13.9023		-11.1442	-3.95349	-4.90233	78.4254	15.6301	24.0328	4.09657	0.979727	1.72869	6.80498
		Strategic	7	18	24	0.227907	8	20	21	49	Strategic	19.1442	15.9535	13.9023		0.748837	4.04651	7.09767	124.193	16.3743	50.377	6.48724	1.02637	3.62364	11.1372
		Cultural	1	10	5	0.0744186	7	6	3	16	Cultural	6.25116	5.2093	4.53953		-3.29767	0.790698	-1.53953	0.560757	0.625203	2.37017	0.0897045	0.120017	0.522117	0.731838
		miscellaneous	3	5	3	0.0511628	1	7	3	11	miscellaneous	4.29767	3.5814	3.12093		0	3.4186	-0.12093	10.8747	11.6869	0.0146241	2.53036	3.26321	0.00468582	5.79826
		C.Total	37	93	85	1	84	70	61	215							0	-8.88178e-16				18.9176	7.53551	7.62826	34.0813
																		x2=	34.08
																								1
		1	Frame and Newspaper
			F/N	NPND%		KND%		APND%		Total%	Chi Square
				N=37		N=93		N=85			Df=10	P value	t value
		frame	Political	0.27027	10	0.24	22	0.25	21	0.246512
			Economic	0.216216	8	0.17	16	0.15	13	0.172093
			INF&DEV	0.216216	8	0.24	22	0.22	19	0.227907
			Strategic	0.189189	7	0.19	18	0.28	24	0.227907
			Cultural	0.027027	1	0.11	10	0.06	5	0.0744186
			miscellaneous	0.0810811	3	0.05	5	0.04	3	0.0511628
		Total			37		93		85
		2	Frame and Tone
			F/T	Positive	Neutral	Negative	Total	Positive	Neutral	Negative	Total	X^2	P	df
				N(%)	N(%)	N(%)	N(%)	%	%	%	%
		Frame	Political	17	18	18	53	32.0755	33.9623	33.9623	100
			Economic	23	7	7	37	62.1622	18.9189	18.9189	100
			INF&DEV	28	12	9	49	57.1429	24.4898	18.3673	100
			Strategic	8	20	21	49	16.3265	40.8163	42.8571	100
			Cultural	7	6	3	16	43.75	37.5	18.75	100
			miscellaneous	1	7	3	11	9.09091	63.6364	27.2727	100
			C.Total	84	70	61	215	39.0698	32.5581	28.3721	100
		Total
		3	Comparision of newspaper tone in different frames										Expected
				NPND(%)	NPND(N)	KND(%)	KND(N)	APND(%)	APND(N)	Total(%)	Total(N)
		Total		0.172	37	0.433	93	0.395	85	1	215
		frame	Political	0.27027	10	0.24	22	0.25	21		53
			Economic	0.216216	8	0.17	16	0.15	13
			INF&DEV	0.216216	8	0.24	22	0.22	19
			Strategic	0.189189	7	0.19	18	0.28	24
			Cultural	0.027027	1	0.11	10	0.06	5
			miscellaneous	0.0810811	3	0.05	5	0.04	3
		Tone	Positive	0.513514	19	0.376344	35	0.352941	30
			Neutral	0.27027	10	0.354839	33	0.317647	27
			Negative	0.216216	8	0.268817	25	0.329412	28
		tone and frame association
							ex=rt*ct/gt
			Positive	Neutral	Negative	RT	Positive	Neutral	Negative
		Political	17	18	18	53	20.707	17.2558	15.0372
		Economic	23	7	7	37		#DIV/0!	#DIV/0!
		INF&DEV	28	12	9	49	#DIV/0!	#DIV/0!	#DIV/0!
		Strategic	8	20	21	49	#DIV/0!	#DIV/0!	#DIV/0!
		Cultural	7	6	3	16	#DIV/0!	#DIV/0!	#DIV/0!
		miscellaneous	1	7	3	11	#DIV/0!	#DIV/0!	#DIV/0!
		C.Total	84	70	61	215
			F/N	Positive	Neutral	Negative	Total
			Political	17	18	18
			Economic	23	7	7
			INF&DEV	28	12	9
			Strategic	8	20	21
			Cultural	7	6	3
			Others	1	7	3
			C.Total	84	70	61
			NPND	KND	APND
			No.	No.	No.	total					df	x^2			total	p
		Political	10	22	21	53	9.12093	22.9256	20.9535	53	10	0.0847242	0.0373688	0.000103244	0.122196
		Economic	8	16	13	37	6.36744	16.0047	14.6279	37	10	0.418574	1.35169e-06	0.181166	0.599742
		INF&DEV	8	22	19	49	8.43256	21.1953	19.3721	49	10	0.0221886	0.0305474	0.00714704	0.0598831
		Strategic	7	18	24	49	8.43256	21.1953	19.3721	49	10	0.243369	0.481721	1.10559	1.83068
		Cultural	1	10	5	16	2.75349	6.92093	6.32558	16	10	1.11666	1.36985	0.277787	2.76431
		miscellaneous	3	5	3	11	1.89302	4.75814	4.34884	11	10	0.647323	0.012294	0.418356	1.07797
			37	93	85	215	37	93	85	215		2.53284	1.93179	1.99015	6.45478
							=
	NPND
		Political
		Economic
		INF&DEV
		Strategic
		Cultural
		miscellaneous
	Total	Newpapr	Tone					Table 1. Net tone analysis
		N/T	Positive	Neutral	Negative	R.Total		N/T	NPND No	NPND %	KND No	KND %	APND No	APND %
		NPND	19	10	8	37		Positive	19	51	35	38	30	35
		KND	35	33	25	93		Neutral	10	27	33	35	27	32
		APND	30	27	28	85		Negative	8	22	25	27	28	33
		C.Total	84	70	61	215		Total	37		93		85
								Net tone	0.29		0.11		0.02
		Subject Areas and Tone of Newspaper Contents
		SA/NT	NPND	KND	APND	RT	+Ve	± Ve	-Ve	%	Df	̇χ2	P
		Pol.	10	22	21	53	17	18	18	25	4	5.027	0.285
		Eco.	8	16	13	37	23	7	7	17	4	4.098	0.393
		Inf&Dev	8	22	19	49	28	12	9	23	4	6.568	0.161
		Strategic	7	18	24	49	8	20	21	23	4	7.634	0.106
		Cult.	1	10	5	16	7	6	3	7	4	2.714	0.607
		Misc.	3	5	3	11	1	7	3	5	4	4.889	0.229
		CT	37	93	85	215	84 (39%)	70 (33%)	61 (28%)
		Subject area/Head tone											Subject area/Head tone
			Positive	Neutral	Negative	Total	Positive	Neutral	Negative	total %	Net Tone			Political	%	Economic	%	INF&DEV	%	Strategic	%	Cultural	%	Miscl.	%	Total
							%	%	%				Positive	17	32	23	62	28	57	8	16	7	44	1	9
		Political	17	18	18	53	32.0755	33.9623	33.9623	100	-0.0188679		Neutral	18	34	7	19	12	24	20	41	6	38	7	64
		Economic	23	7	7	37	62.1622	18.9189	18.9189	100	0.432432		Negative	18	34	7	19	9	18	21	43	3	19	3	27
		INF&DEV	28	12	9	49	57.1429	24.4898	18.3673	100	0.387755		Total	53		37		49		49		16		11
		Strategic	8	20	21	49	16.3265	40.8163	42.8571	100	-0.265306		Net tone	-0.02		0.43		0.39		-0.27		0.25		-0.18		0.1
		Cultural	7	6	3	16	43.75	37.5	18.75	100	0.25
		miscellaneous	1	7	3	11	9.09091	63.6364	27.2727	100	-0.181818
		Total					220.548	219.324	160.128	600	0.100699
		Table 1
		BRI analysis
		SA/NT	Pol.	Eco.	Inf&Dev	Strategic	Cult.	Misc.	Total
		NPND	10	8	8	7	1	3	37
		KND	22	16	22	18	10	5	93
		APND	21	13	19	24	5	3	85
		Total							215

## Sheet: Sheet1
			bijaya sir
				F/N	NPND	KND	APND	RT	Positive	Neutral	Negative
				Political	10	22	21	53	17	18	18
				Economic	8	16	13	37	23	7	7
				INF&DEV	8	22	19	49	28	12	9
				Strategic	7	18	24	49	8	20	21
				Cultural	1	10	5	16	7	6	3
				Miscellaneous	3	5	3	11	1	7	3
				CT	37	93	85	215	84	70	61
			Yam ji
				F/N	NPND	KND	APND	RT	+Ve	± Ve	-Ve	Df	̇χ2	P
				Pol.	10	22	21	53	17	18	18	4	5.027	0.285
				Eco.	8	16	13	37	23	7	7	4	4.098	0.393
				INF&DEV	8	22	19	49	28	12	9	4	6.568	0.161
				Strateg.	7	18	24	49	8	20	21	4	7.634	0.106
				Cult.	1	10	5	16	7	6	3	4	2.714	0.607
				Misc.	3	5	3	11	1	7	3	4	4.889	0.229
				CT	37	93	85	215	84(39%)	70(33%)	61(28%)
				Relationship between media and tone
				Categories	Positive	Neutral	Negative	X2	Df	p-value
				NPND	19	10	8	2.84	4	0.092
				KND	35	33	25	0.13	4	0.719
				APND	30	27	28	1.44	4	0.23
				F/N	Positive	Neutral	Negative	RT
				Political	17	18	18	53
				Economic	23	7	7	37
				INF&DEV	28	12	9	49
				Strategic	8	20	21	49
				Cultural	7	6	3	16
				Miscellaneous	1	7	3	11
				CT	84	70	61	215

## Sheet: Analyzied data
	1	Total newspare/tone
		N/T	Positive	Neutral	Negative	R.Total
		NPND	19	10	8	37
		KND	35	33	25	93
		APND	30	27	28	85
		C.Total	84	70	61	215
	2	Total categories and tone										overall tone	totao	%
		T/C	Positve	Neutral	Negative	Total						Posiitve	84	0.390698
		NWS	39	47	30	116						Neutral	70	0.325581
		EDI	0	5	0	5						Negative	61	0.283721
		OPI	20	12	23	55
		REM/INT	25	6	8	39
		Total	84	70	61	215
		%	0.390698	0.325581	0.283721	1
	3	Total frame and tone
		F/N	Positive	Neutral	Negative	RT
		Political	17	18	18	53
		Economic	23	7	7	37
		INF&DEV	28	12	9	49
		Strategic	8	20	21	49
		Cultural	7	6	3	16
		miscellaneous	1	7	3	11
		C.Total	84	70	61	215
	4	Total Newspaper and categories
		N/C	NWS	EDI	OPI	REM/INT	Total
		NPND	18	1	12	6	37
		KND	54	1	22	16	93
		APND	42	3	21	19	85
	Total		114	5	55	41	215
	Percentage		0.530233	0.0232558	0.255814	0.190698	1
												observed
	5	Comparision of newspaper tone in different frames
			NPND(%)	NPND(N)	KND(%)	KND(N)	APND(%)	APND(N)	Total(%)	Total(N)
	Total		0.172	37	0.433	93	0.395	85	1	215
	Frame	Political	0.27027	10	0.24	22	0.25	21		53		3
		Economic	0.216216	8	0.17	16	0.15	13		37
		INF&DEV	0.216216	8	0.24	22	0.22	19		49
		Strategic	0.189189	7	0.19	18	0.28	24		49
		Cultural	0.027027	1	0.11	10	0.06	5		16
		miscellaneous	0.0810811	3	0.05	5	0.04	3		11
			1		1		1
	Tone	Positive	0.513514	19	0.376344	35	0.352941	30
		Neutral	0.27027	10	0.354839	33	0.317647	27
		Negative	0.216216	8	0.268817	25	0.329412	28
	6	Total frames and newspaper
			NPND(%)	NPND(N)	KND(%)	KND(N)	APND(%)	APND(N)	Total%	Total frequency	Chi Square
	Total		0.172	37	0.433	93	0.395	85			Df=10	P value	t value
	frame	Political	0.27027	10	0.24	22	0.25	21	0.246512	53
		Economic	0.216216	8	0.17	16	0.15	13	0.172093	37
		INF&DEV	0.216216	8	0.24	22	0.22	19	0.227907	49
		Strategic	0.189189	7	0.19	18	0.28	24	0.227907	49
		Cultural	0.027027	1	0.11	10	0.06	5	0.0744186	16
		miscellaneous	0.0810811	3	0.05	5	0.04	3	0.0511628	11
	7	F/C	NWS	EDI	OPI	REM/INT	Total	%
		Political	28	2	9	14	53	0.246512
		Economic	15	0	12	10	37	0.172093
		Inf&Dev	24	3	13	9	49	0.227907
		Strategic	25	0	18	6	49	0.227907
		Cultural	13	0	3	0	16	0.0744186
		miscellaneous	11	0	0	0	11	0.0511628
		Total	116	5	55	39	215	1
			0.539535	0.0232558	0.255814	0.181395
	Total frame	theme	Frenquency	Positive	Neutral	Negative
		Political	53	17	18	18
		Economic	37	23	7	7
		Inf&Dev	49	28	12	9
		Strategic	49	8	20	21
		Cultural	16	7	6	3
		miscellaneous	11	1	7	3
			mean	12.5	9.5	8
	%
		NPND	37	0.172093
		KND	93	0.432558
		APND	85	0.395349
			215	1
																	16	53	30
																	13	47	39
																	30	39	29
																	32	55	11
																	22.75	48.5	27.25	98.5
																				32.8333

## Sheet: Total data in one chart
		Subjects/Tones	Positive												Neutra												Negative
			NWS			EDI			OPI			REM/INT			NWS			EDI			OPI			REM/INT			NWS			EDI			OPI			REM/INT
			NPND	KND	APND	NPND	KND	APND	NPND	KND	APND	NPND	KND	APND	NPND	KND	APND	NPND	KND	APND	NPND	KND	APND	NPND	KND	APND	NPND	KND	APND	NPND	KND	APND	NPND	KND	APND	NPND	KND	APND
	Subjects	Political	2	2	2	0	0	0	0	0	0	2	6	3	3	5	5	1	0	1	0	1	1	0	0	1	0	6	3	0	0	0	2	2	3	0	0	2	53
		Economic	1	3	4	0	0	0	2	6	0	2	3	2	0	1	2	0	0	0	1	0	1	1	0	1	0	3	1	0	0	0	1	0	1	0	0	1	37
		Inf&Dev	2	6	6	0	0	0	3	1	4	1	3	2	1	5	0	0	1	2	0	2	0	0	1	0	1	1	2	0	0	0	0	1	2	0	1	1	49
		Strategic	2	1	2	0	0	0	0	0	2	0	0	1	2	7	4	0	0	0	0	3	2	0	0	2	1	3	3	0	0	0	2	4	5	0	0	3	49
		Cultural	0	3	2	0	0	0	1	1	0	0	0	0	0	3	2	0	0	0	0	1	0	0	0	0	0	2	1	0	0	0	0	0	0	0	0	0	16
		miscellaneous	1	0	0	0	0	0	0	0	0	0	0	0	1	3	3	0	0	0	0	0	0	0	0	0	1	2	0	0	0	0	0	0	0	0	0	0	11
	Total		8	15	16	0	0	0	6	8	6	5	12	8	7	24	16	1	1	3	1	7	4	1	1	4	3	17	10	0	0	0	5	7	11	0	1	7	215

[truncated: 1 more sheets: Reliability Test]
